# Supplementary material
Source: HighWire-hosted journal article supplement (https://tsaco.smart01.highwire.org/content/9/1/e001239)
Supplement: inline-supplementary-material-1 [file inline-supplementary-material-1.pdf]

Supplemental Table 1. Gastrointestinal complications definitions

| <b>Gastrointestinal complication</b> | <b>Definition</b>                                                                                     |
|--------------------------------------|-------------------------------------------------------------------------------------------------------|
| Feeding intolerance                  | A delay ( $\geq 4$ days after admittance) in reaching 30% of target goal energy with enteral feeding. |
| Ileus*                               | Radiographic finding with generalized distension of the intestine.                                    |
| Diarrhea*                            | Three or more loose or liquid stools per day on 2 consecutive days.                                   |
| Constipation*                        | The absence of stool for more than 3 days on 2 consecutive days.                                      |

\*Only complications that occurred within 2 weeks after admittance were used.

## Supplemental Figure 1. Flowchart of patients with splenic injury.

ER, Emergency room; ICU, intensive care unit; REBOA, resuscitative endovascular balloon occlusion of the aorta.

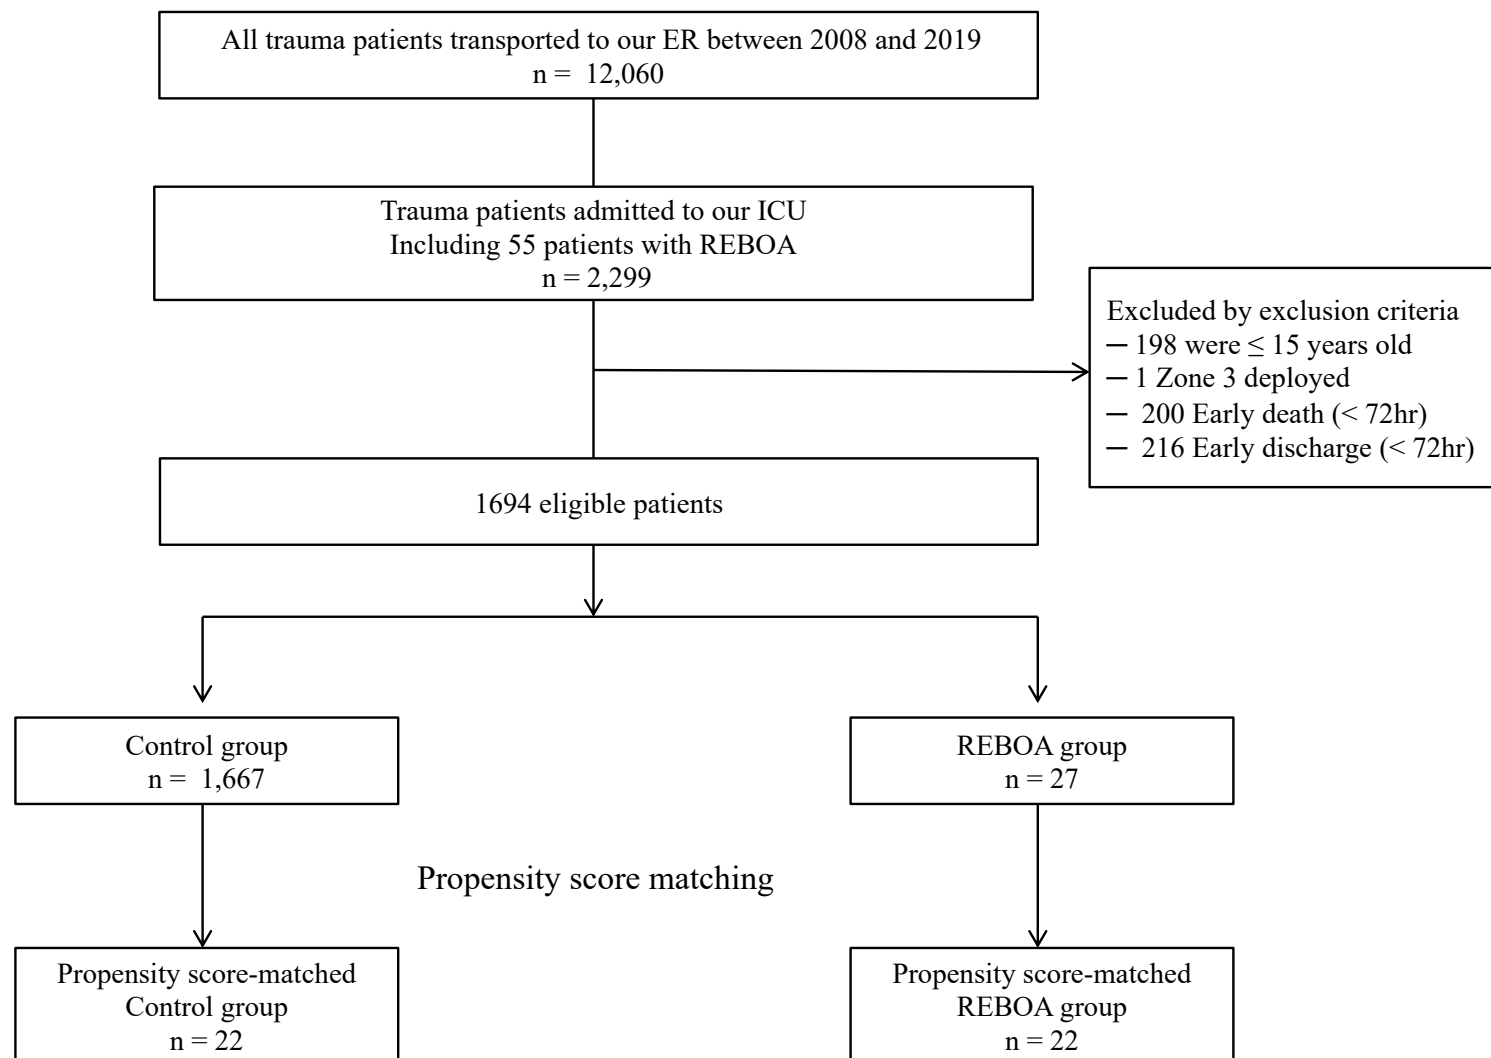

## Supplemental Table 2.

Table. Demographic Characteristics of All Patients Before Propensity Score Matching With or Without REBOA

|                                           | REBOA<br>(n = 27) | No-REBOA<br>(n = 1667) | <i>p</i> | Standardized<br>Difference |
|-------------------------------------------|-------------------|------------------------|----------|----------------------------|
| Patient characteristics                   |                   |                        |          |                            |
| Male, n (%)                               | 22 (81.5)         | 1180 (70.8)            | 0.287    | 0.253                      |
| Age, (y)                                  | 40 (25-50)        | 55 (38-72)             | 0.001    | -0.636                     |
| Age ≥ 65 (y), n (%)                       | 4 (14.8)          | 634 (38.0)             | 0.015    | -0.546                     |
| BMI                                       | 21 (18-24)        | 22 (20-25)             | 0.015    | 0.521                      |
| Blunt mechanism, n (%)                    | 24 (88.9)         | 1567 (94.0)            | 0.223    | -0.184                     |
| REBOA placement zone, n (%)               |                   |                        |          |                            |
| Zone 1                                    | 19 (70.4)         | -                      | -        | -                          |
| Zone 2                                    | 8 (29.6)          | -                      | -        | -                          |
| ISS                                       | 34 (18-45)        | 16 (9-25)              | <0.001   | 1.421                      |
| ISS ≥ 25, n (%)                           | 20 (74.1)         | 433 (26.2)             | <0.001   | 1.097                      |
| SBP < 80 mmHg, n (%)                      | 14 (51.9)         | 83 (5.0)               | <0.001   | 1.216                      |
| GCS < 9, n (%)                            | 13 (48.1)         | 238 (15.0)             | <0.001   | 0.785                      |
| Associated injury                         |                   |                        |          |                            |
| Head AIS ≥ 3, n (%)                       | 9 (33.3)          | 613 (36.8)             | 0.841    | -0.072                     |
| Chest AIS ≥ 3, n (%)                      | 14 (51.9)         | 578 (34.7)             | 0.069    | 0.352                      |
| Abdomen AIS ≥ 3, n (%)                    | 16 (59.3)         | 160 (9.6)              | <0.001   | 1.226                      |
| Pelvis and lower extremity AIS ≥ 3, n (%) | 12 (44.4)         | 413 (24.8)             | 0.025    | 0.423                      |
| Bowel and mesenteric injury, n (%)        | 3 (11.1)          | 59 (3.5)               | 0.073    | 0.293                      |
| Emergency surgery                         |                   |                        |          |                            |
| Craniotomy, n (%)                         | 1 (3.7)           | 109 (6.5)              | 1        | -0.129                     |
| Thoracotomy, n (%)                        | 4 (14.8)          | 23 (1.4)               | <0.001   | 0.508                      |
| Celiotomy, n (%)                          | 14 (51.9)         | 80 (4.8)               | <0.001   | 1.224                      |
| Angioembolization, n (%)                  | 19 (70.4)         | 186 (11.2)             | <0.001   | 1.510                      |

Continuous variables are presented as median (IQR). Categorical variables are presented as number (%).

SBP: systolic blood pressure, HR: heart rate, GCS: Glasgow Coma Scale, ISS: injury severe score, IVC:

inferior vena cava, AIS: Abbreviated Injury Scale.

## Supplemental Table 3.

Table. Clinical Outcomes of All Patients Before Propensity Score Matching With or Without REBOA

|                              | REBOA<br>(n = 27) | No-REBOA<br>(n = 1667) | <i>p</i> |
|------------------------------|-------------------|------------------------|----------|
| Feeding intolerance, n (%)   | 19 (70.4)         | 338 (20.3)             | <0.001   |
| Parental nutrition, n (%)    | 5 (18.5)          | 83 (5.0)               | <0.001   |
| In hospital mortality, n (%) | 2 (7.4)           | 89 (5.3)               | 0.657    |
| Ventilator days (days)       | 5.0 (4.0-8.3)     | 0.0 (0.0-3.0)          | <0.001   |
| ICU length of stay (days)    | 17.0 (11.0-25.8)  | 7.0 (4.0-13.0)         | <0.001   |
| Length of stay (days)        | 52.0 (28.0-91.0)  | 20.0 (10.0-42.0)       | <0.001   |

Continuous variables are presented as median (IQR). Categorical variables are presented as number (%).

ICU: intensive care unit.
